# Supplementary material for: Upconversion luminescence in cellulose composites (fibres and paper) modified with lanthanide-doped SrF2 nanoparticles
Source: Royal Society of Chemistry journal article supplement (doi:10.1039/d0tc02050h), 2020-01-01
Supplement: d0tc02050h1.pdf [file d0tc02050h1.pdf]

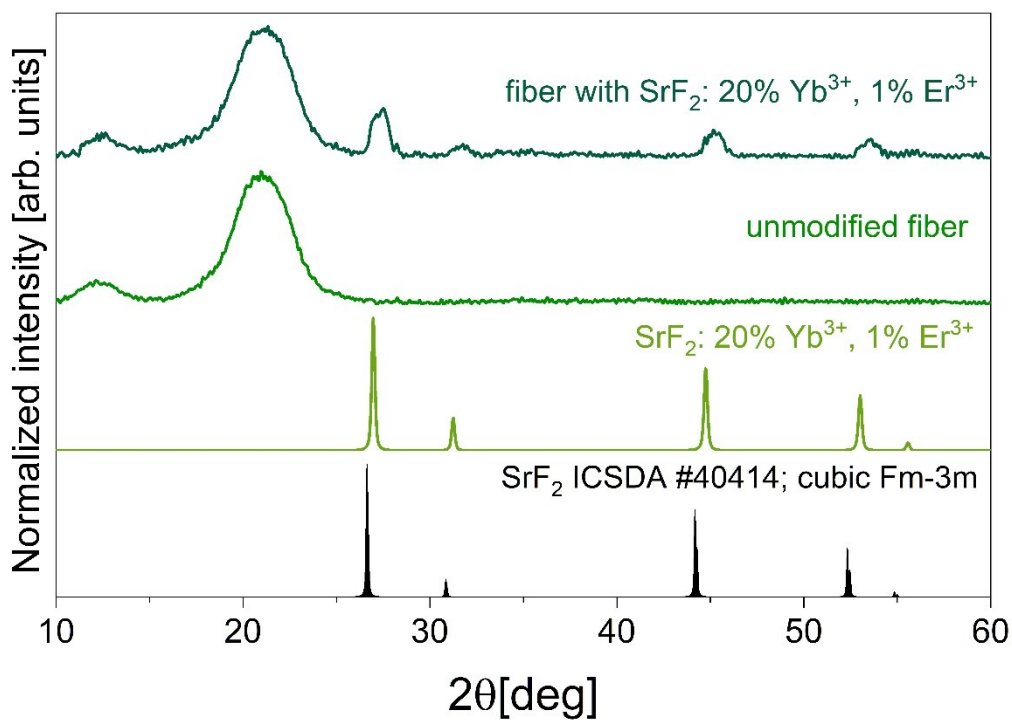

Figure S1. XRD patterns of the  $\text{SrF}_2$ :  $\text{Yb}^{3+}$ ,  $\text{Er}^{3+}$  NPs, pure and modified fiber.

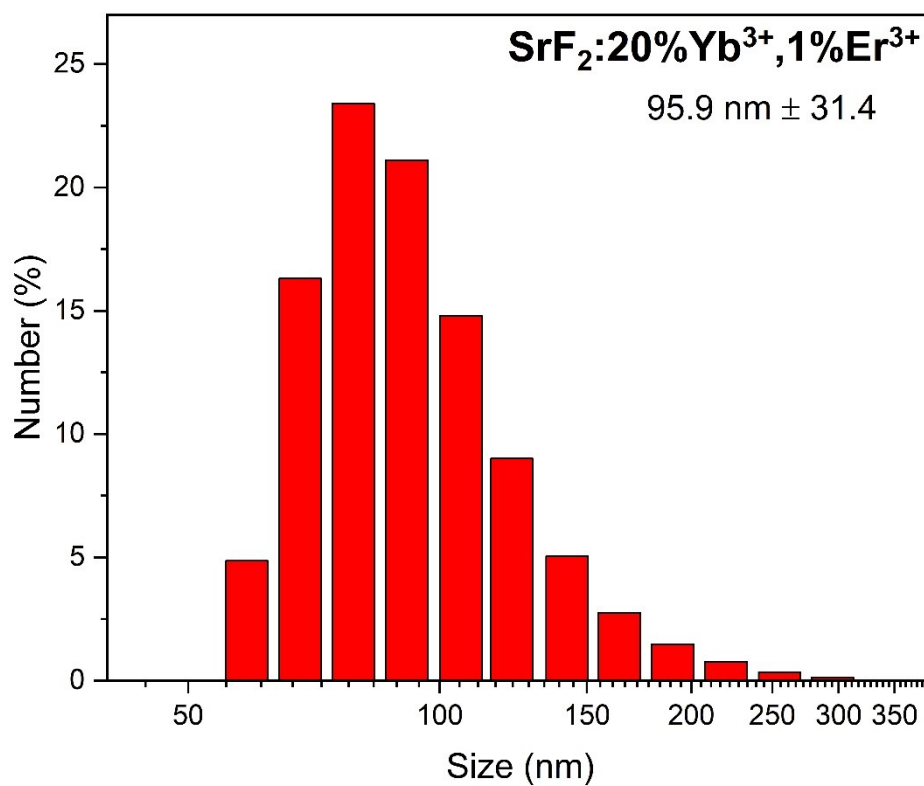

Fig. S2 DLS analysis of the nanoparticles  $\text{SrF}_2$  doped with 20% of  $\text{Yb}^{3+}$  and 1%  $\text{Er}^{3+}$  ions.

Table S1 Metal ions composition of synthesised NPs analysed by ICP-OES.

| Sample                                                      | Sr <sup>2+</sup> | Yb <sup>3+</sup> | Er <sup>3+</sup> |
|-------------------------------------------------------------|------------------|------------------|------------------|
| SrF <sub>2</sub> :20%Yb <sup>3+</sup> , 1 %Er <sup>3+</sup> | 75.22            | 23.63            | 1.15             |

Table S2 Zeta potential of fluoride modifier SrF<sub>2</sub> in physiological pH

| Sample                                                      | pH   | Zeta potential [mV] |
|-------------------------------------------------------------|------|---------------------|
| SrF <sub>2</sub> :20%Yb <sup>3+</sup> , 1 %Er <sup>3+</sup> | 7.46 | -19.5 ± 8.1         |

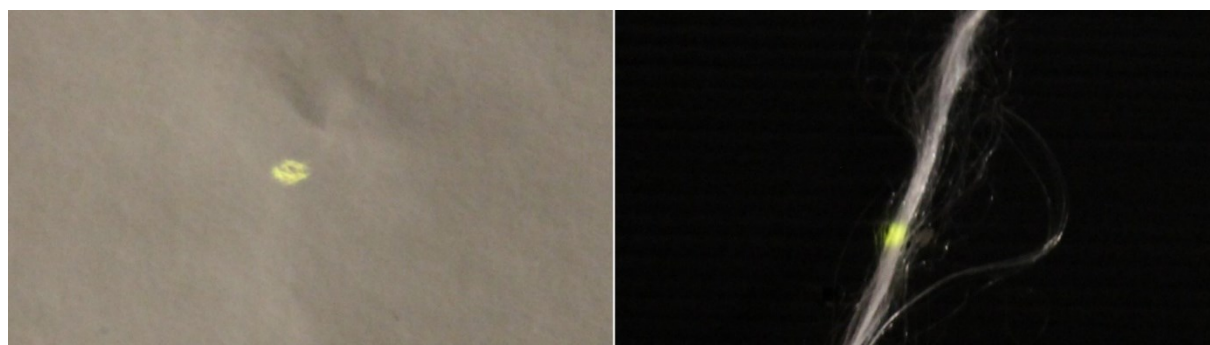

Fig. S3 Photo of the paper (left) and fiber (right) modified with FM under CW laser excitation,  $\lambda_{\text{exc}} - 980 \text{ nm}$ .

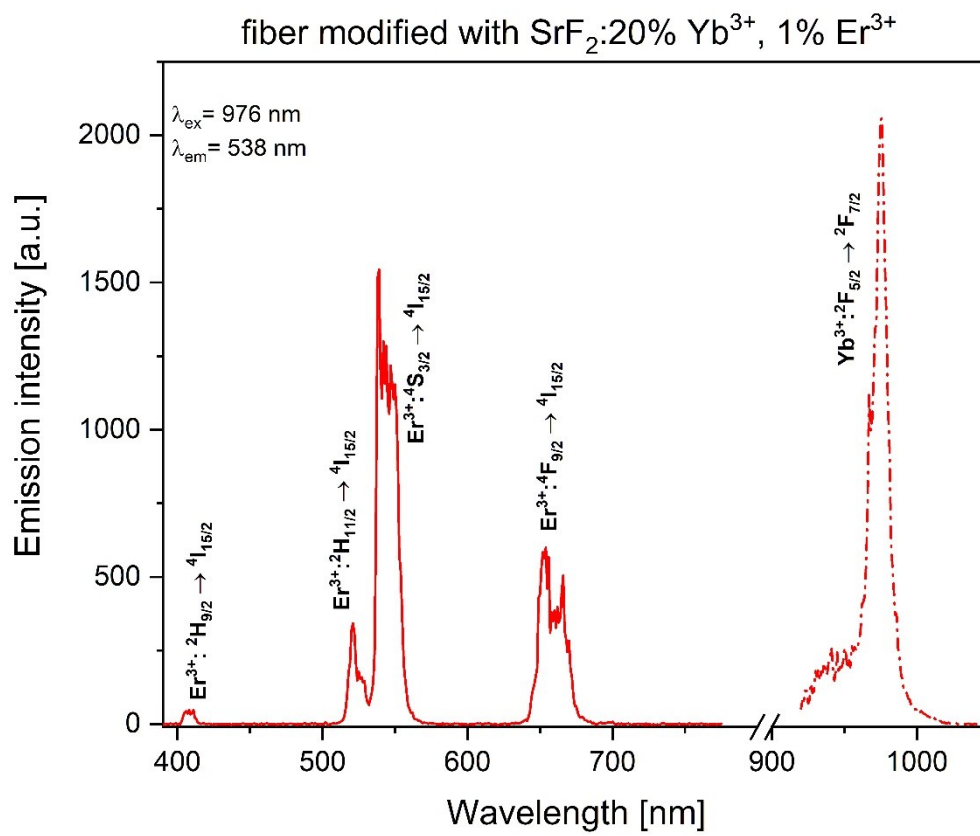

Fig. S4 Emission and excitation spectra of modified fibres excited with impulse laser.

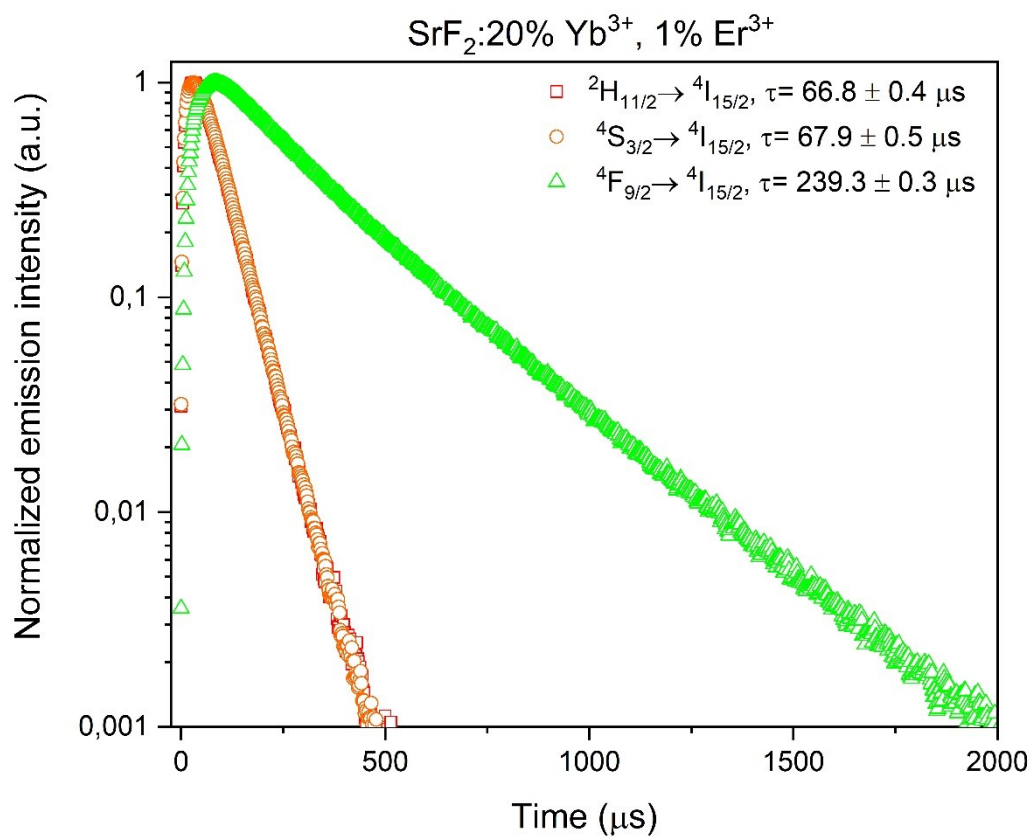

Fig. S5 Upconversion luminescence decay curves and determined lifetimes of SrF<sub>2</sub>:Yb<sup>3+</sup>, Er<sup>3+</sup> NPs (FM).

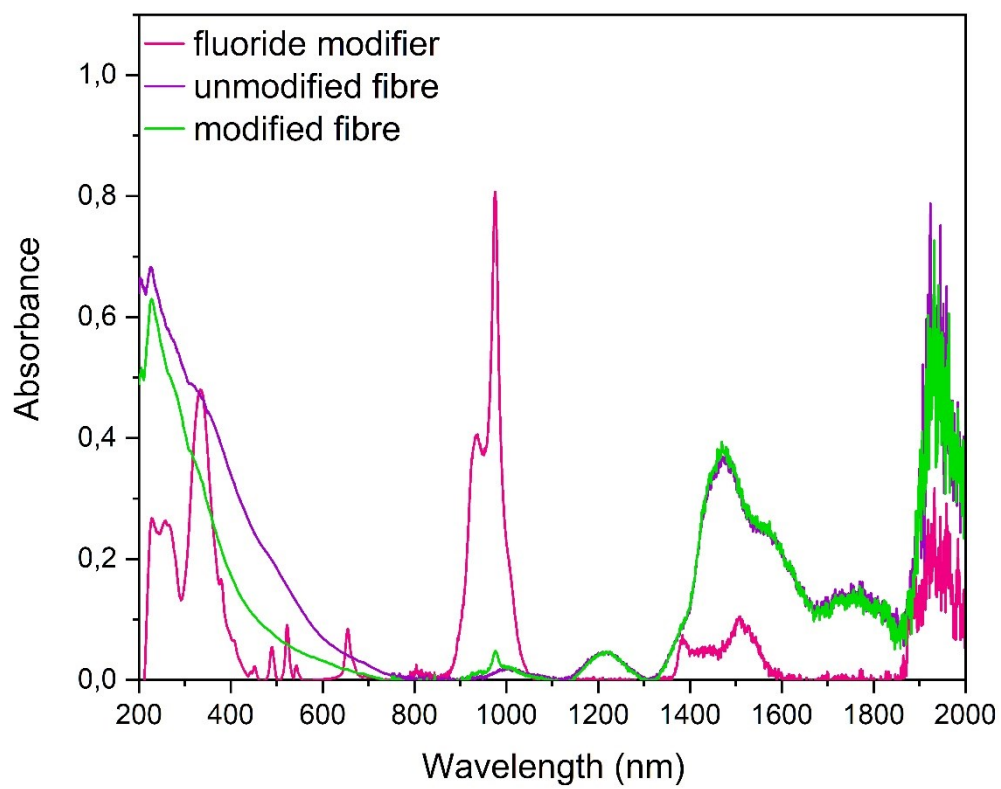

Fig. S6 Absorbance of fluoride modifier, unmodified fibre and modified spectra

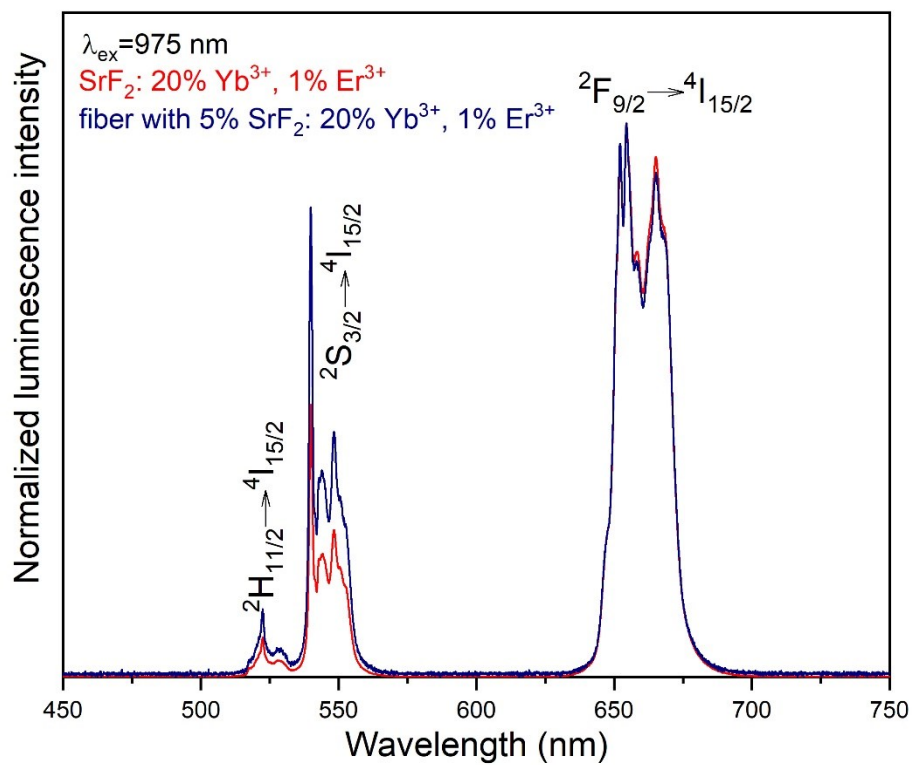

Fig. S7 Emission spectra of FM NPs and fibers modified with FM.

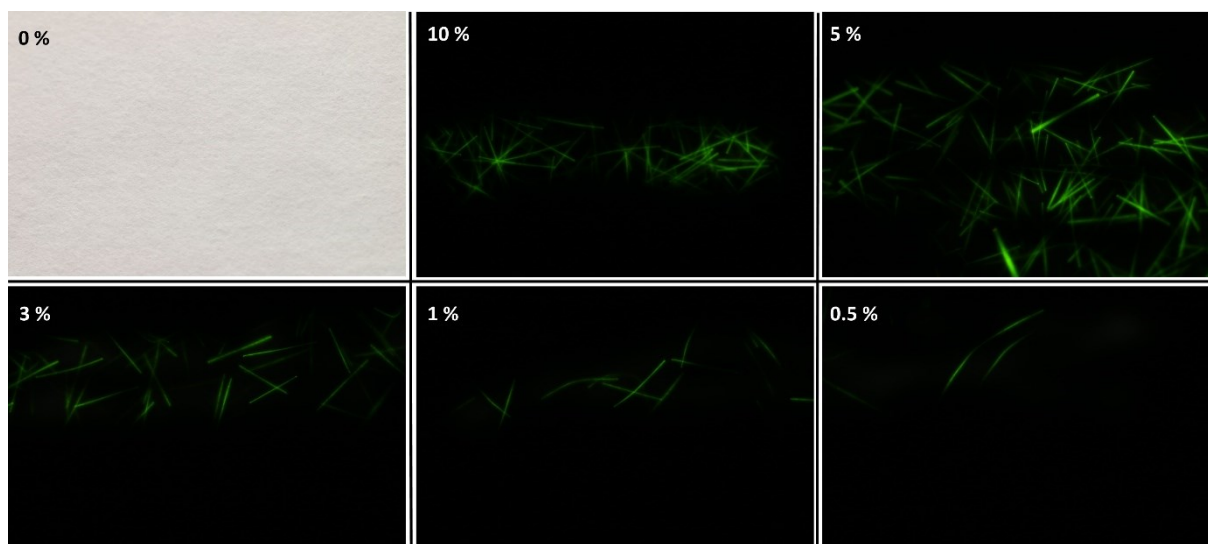

Fig. S8 Photographs of modified paper sheets taken with a Canon EOS 70D camera.
